# Supplementary material for: DBU-mediated metal-free oxidative cyanation of α-amino carbonyl compounds: using molecular oxygen as the oxidant
Source: Royal Society of Chemistry journal article supplement (doi:10.1039/c5ob01690h), 2015-11-05
Supplement: c5ob01690h1.pdf [file c5ob01690h1.pdf]

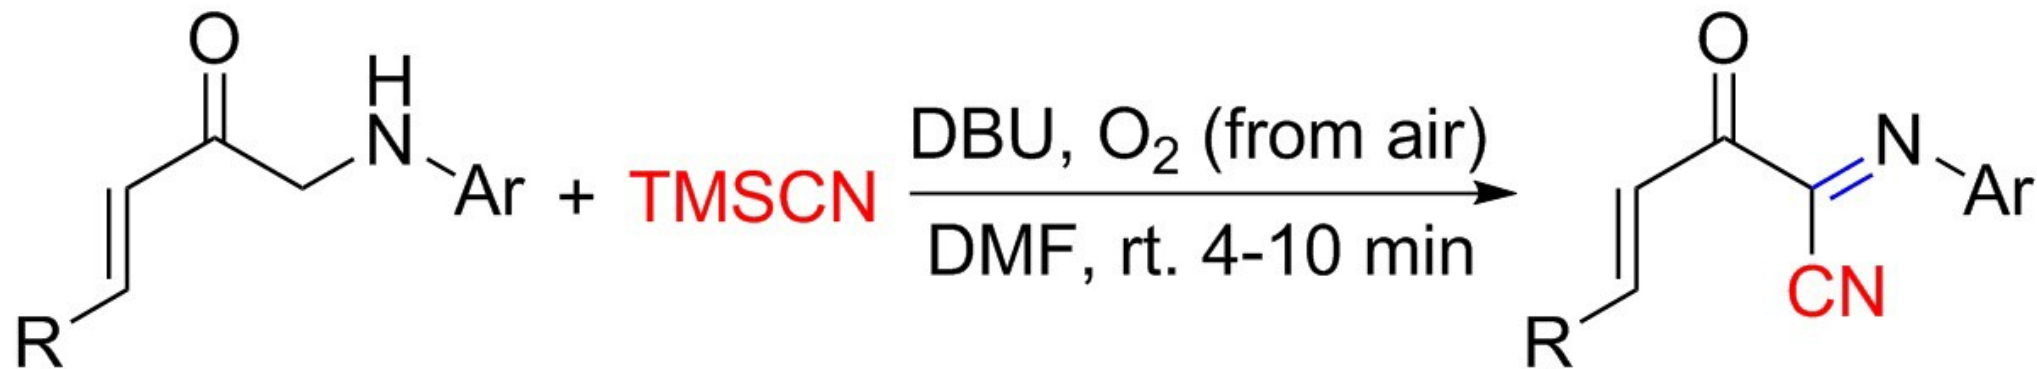

- metal- and chemical oxidant-free
- employ air as the sole oxidant
- mild reaction conditions
- short reaction time
