# Supplementary material for: DBU-mediated metal-free oxidative cyanation of α-amino carbonyl compounds: using molecular oxygen as the oxidant
Source: Royal Society of Chemistry journal article supplement (doi:10.1039/c5ob01690h), 2015-11-05
Supplement: c5ob01690h8.pdf [file c5ob01690h8.pdf]

**Table 1** Optimization of Reaction Conditions<sup>a</sup>

| Entry          | Base (equiv)                          | Solvent                         | Time (min) | <b>3a</b> Yield <sup>b</sup> (%) | <b>4a</b> Yield <sup>b</sup> (%) |
|----------------|---------------------------------------|---------------------------------|------------|----------------------------------|----------------------------------|
| 1              | DBU (0.5)                             | DMF                             | 5          | 38                               | 14                               |
| 2              | DBU (1.0)                             | DMF                             | 4          | 65                               | 10                               |
| 3 <sup>c</sup> | DBU (1.5)                             | DMF                             | 4          | 72                               | 5                                |
| 4 <sup>c</sup> | DBU (2.0)                             | DMF                             | 4          | 66                               | 5                                |
| 5              | DBN (2.0)                             | DMF                             | 4          | 35                               | 10                               |
| 6              | NaOH (1.5)                            | DMF                             | 8          | 41                               | 7                                |
| 7 <sup>d</sup> | DABCO (1.5)                           | DMF                             | 30         | ---                              | ---                              |
| 8 <sup>d</sup> | Et <sub>3</sub> N (1.5)               | DMF                             | 30         | ---                              | ---                              |
| 9 <sup>d</sup> | Cs <sub>2</sub> CO <sub>3</sub> (1.5) | DMF                             | 30         | ---                              | ---                              |
| 10             | DBU (1.5)                             | MeCN                            | 5          | 64                               | 12                               |
| 11             | DBU (1.5)                             | THF                             | 8          | 61                               | 15                               |
| 12             | DBU (1.5)                             | CH <sub>2</sub> Cl <sub>2</sub> | 8          | 35                               | 18                               |
| 13             | DBU (1.5)                             | Toluene                         | 6          | 61                               | 17                               |

<sup>a</sup> Reaction conditions: **1a** (0.2 mmol), **2** (0.3 mmol), base (0.1-0.4 mmol), solvent (1.5 mL), at room temperature for 4-30 min. <sup>b</sup> Estimated by <sup>1</sup>H NMR spectroscopy using dimethyl phthalate as an internal standard. <sup>c</sup> Isolated yield. <sup>d</sup> Complex mixture was obtained.
