# Supplementary figures and images for: DBU-mediated metal-free oxidative cyanation of α-amino carbonyl compounds: using molecular oxygen as the oxidant
Source: Royal Society of Chemistry journal article supplement (doi:10.1039/c5ob01690h), 2015-11-05

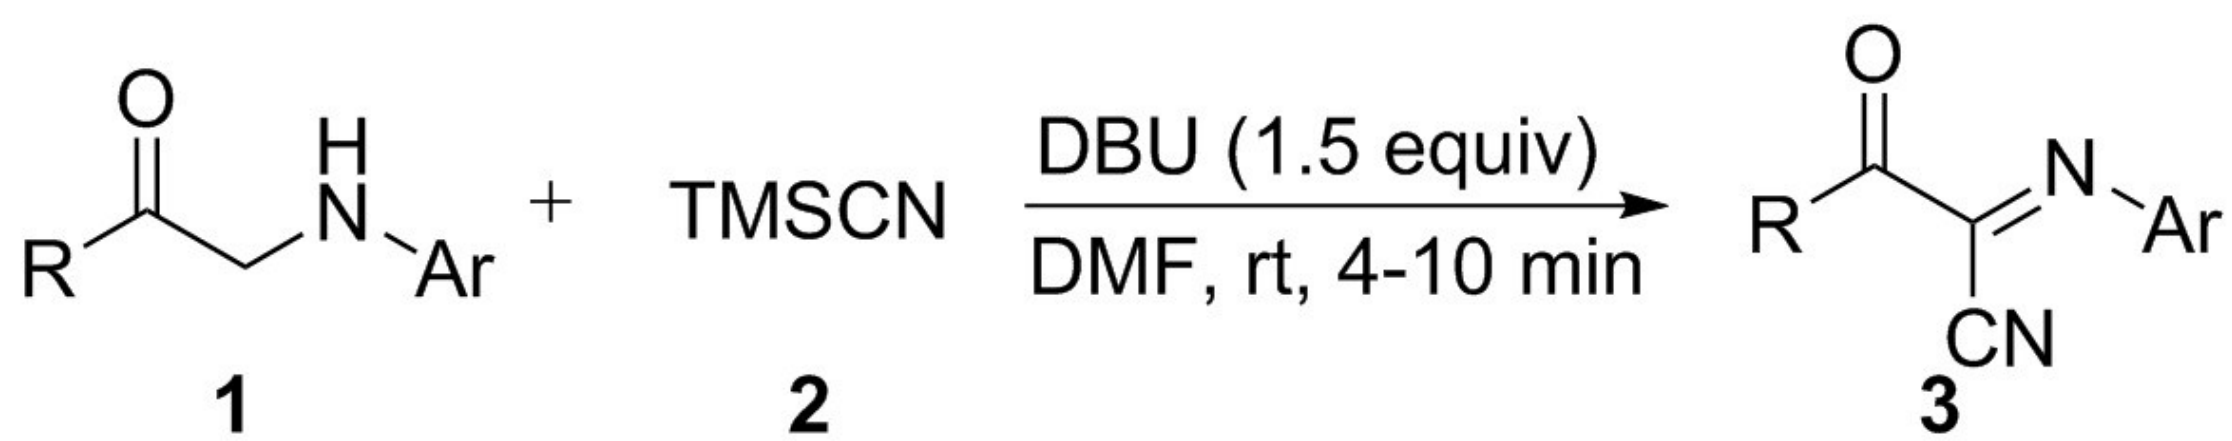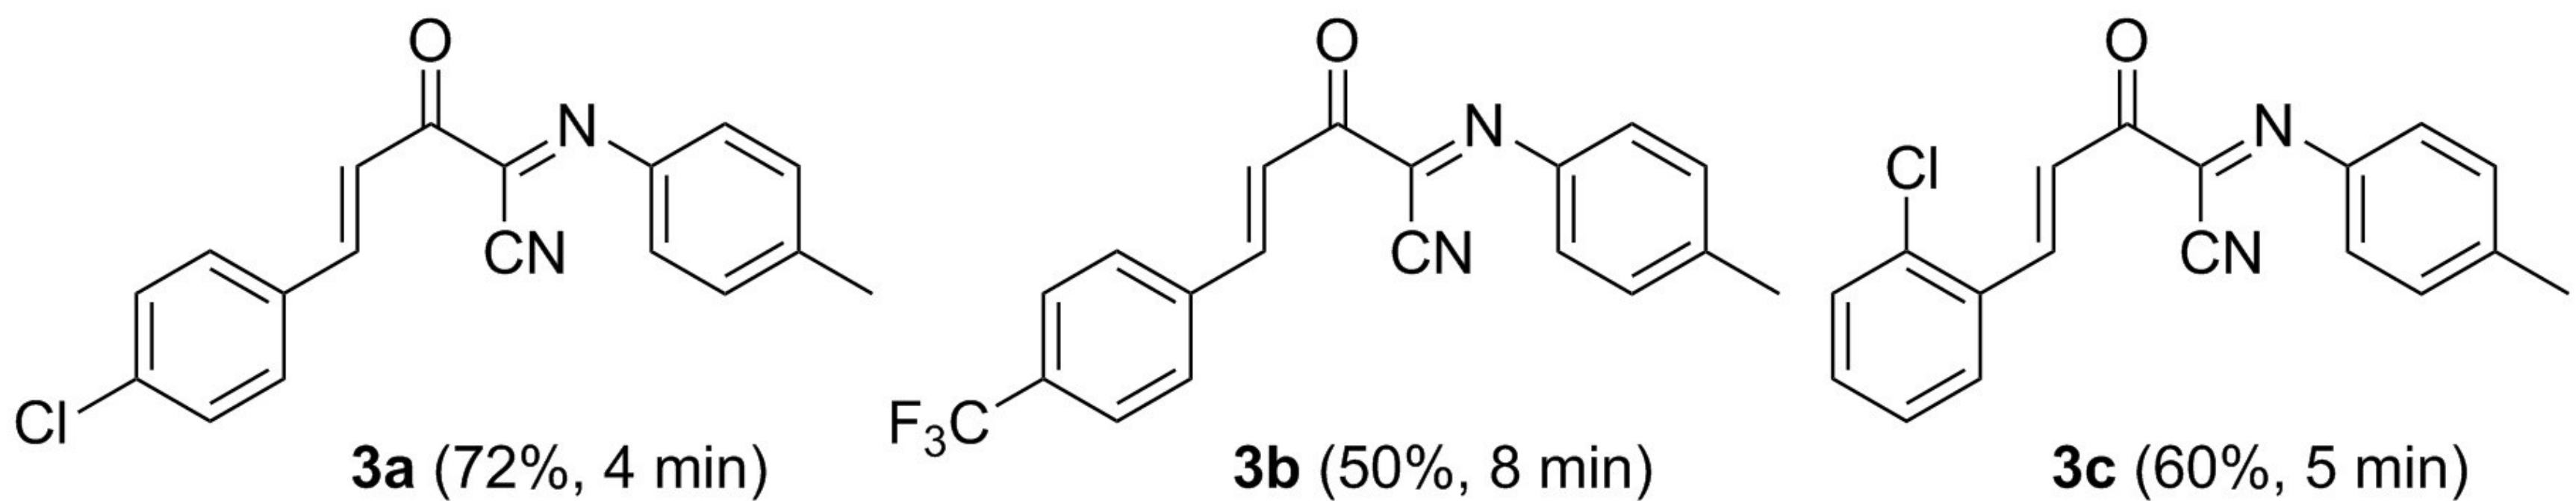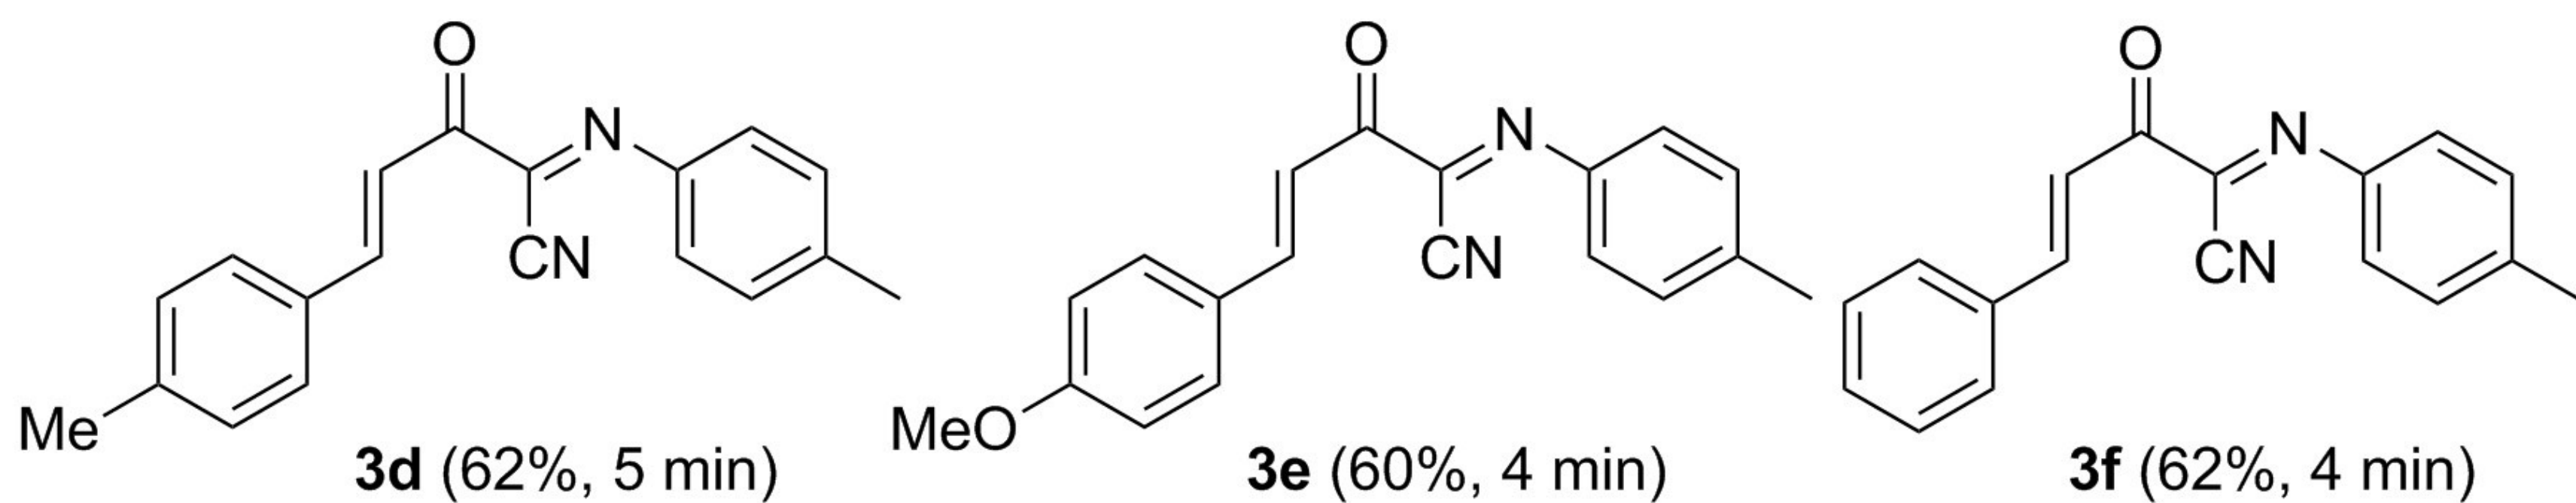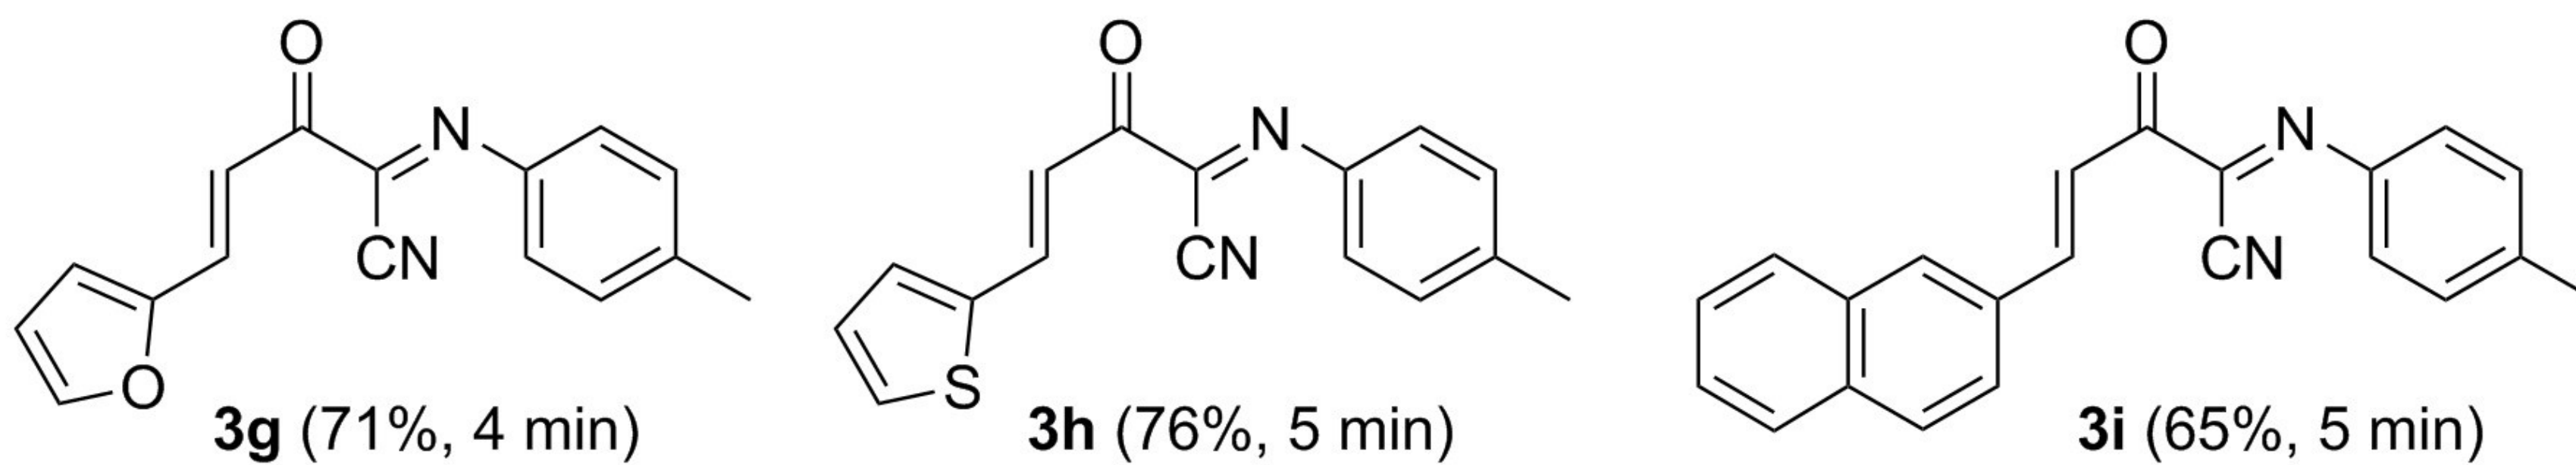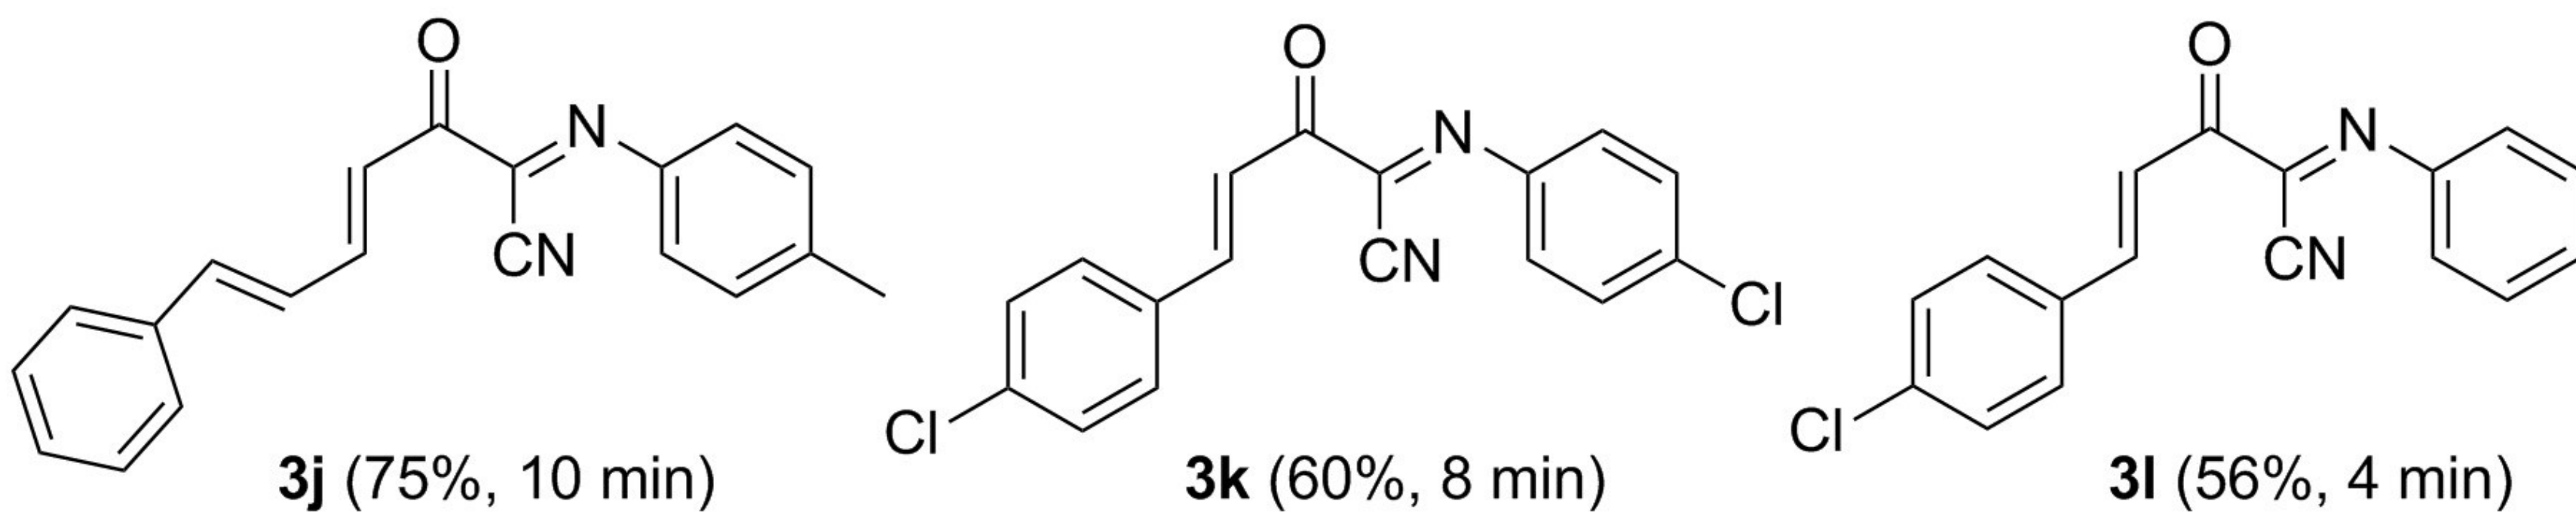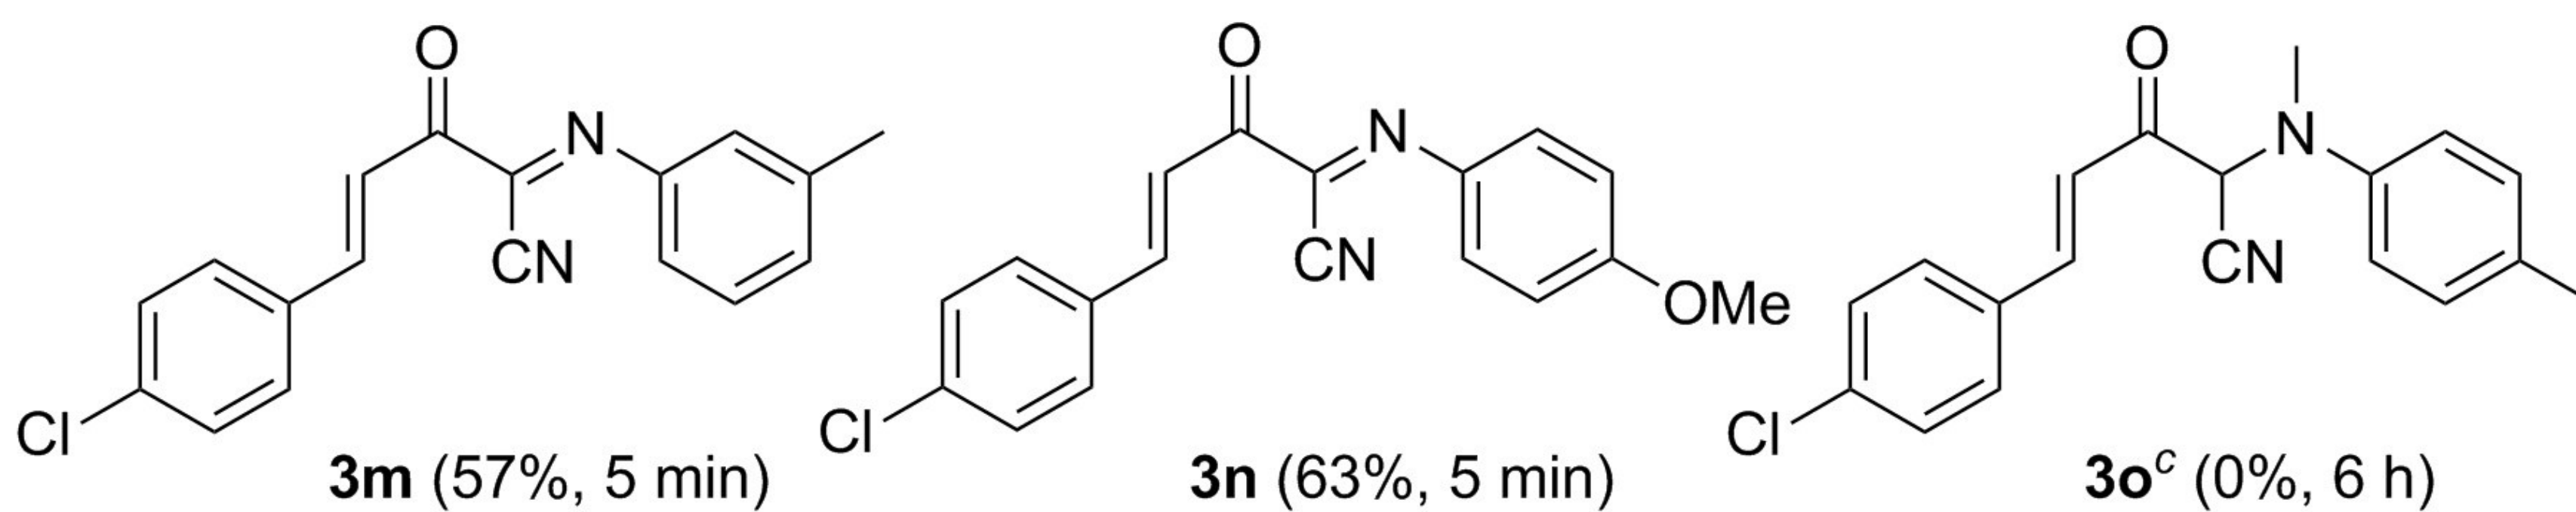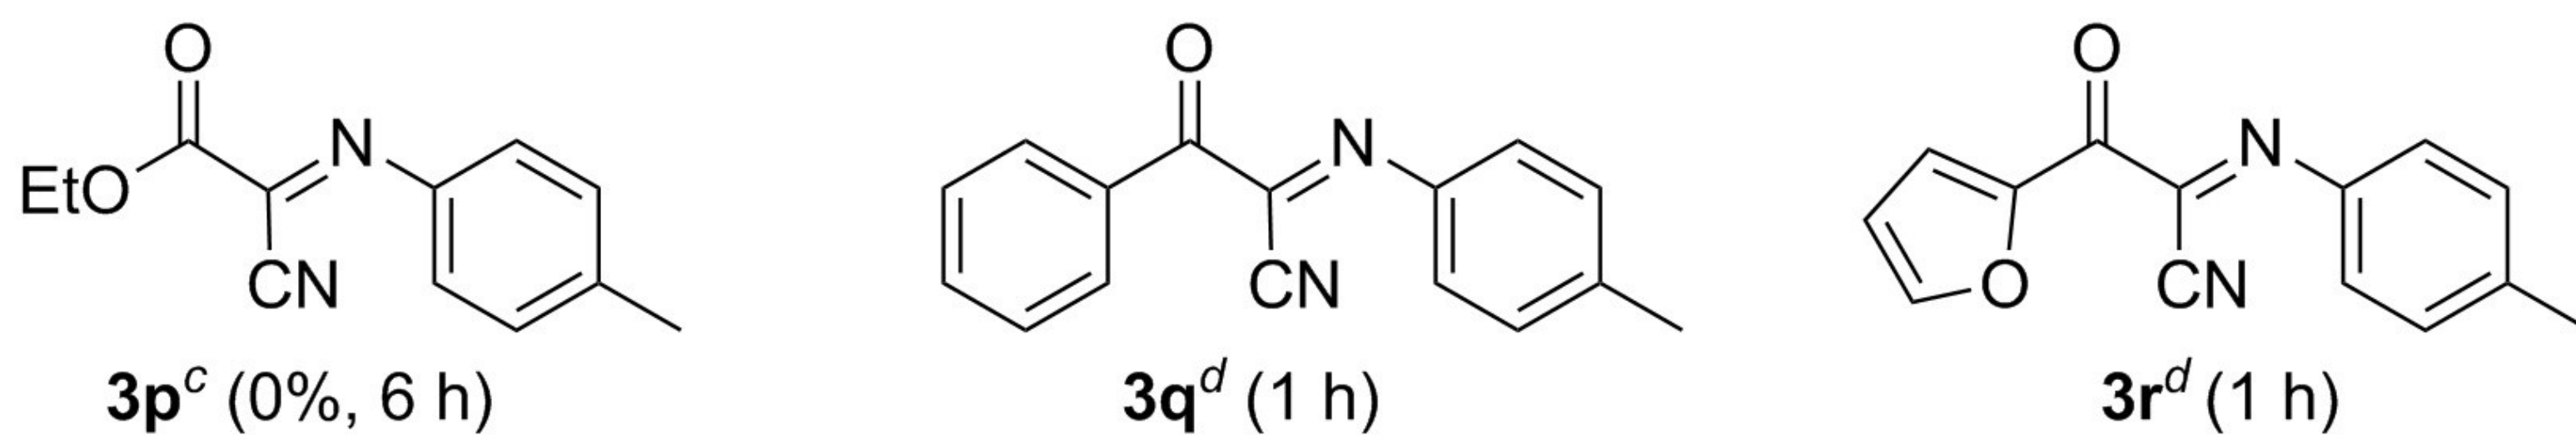

Supplement: c5ob01690h3.pdf [file c5ob01690h3.pdf]

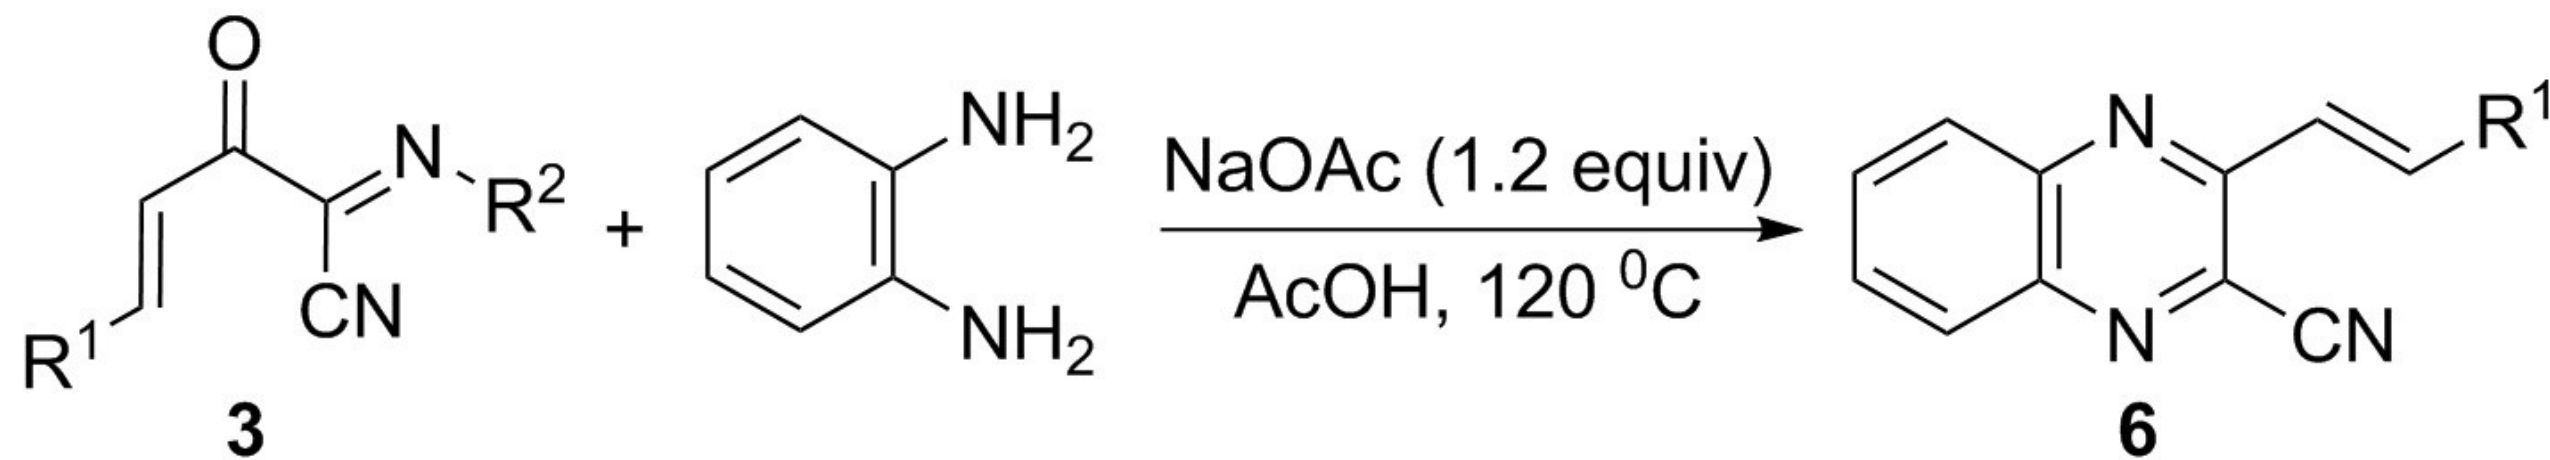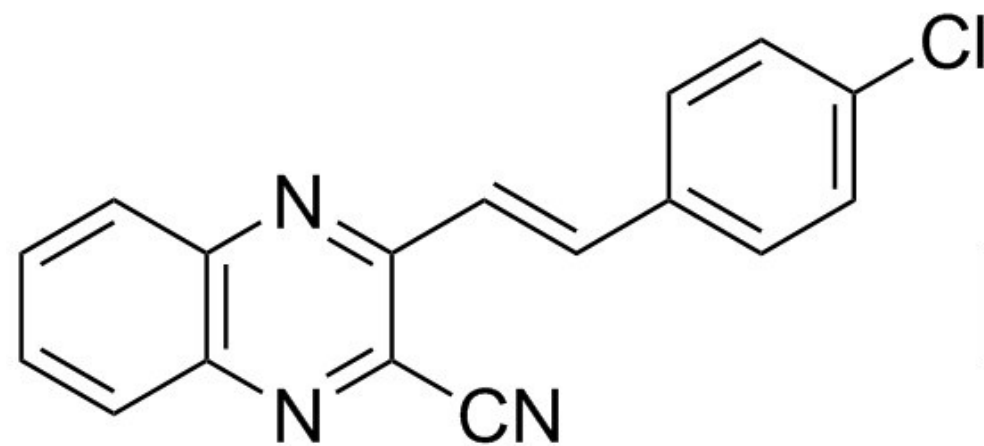

**6a** (92%, 10 min)

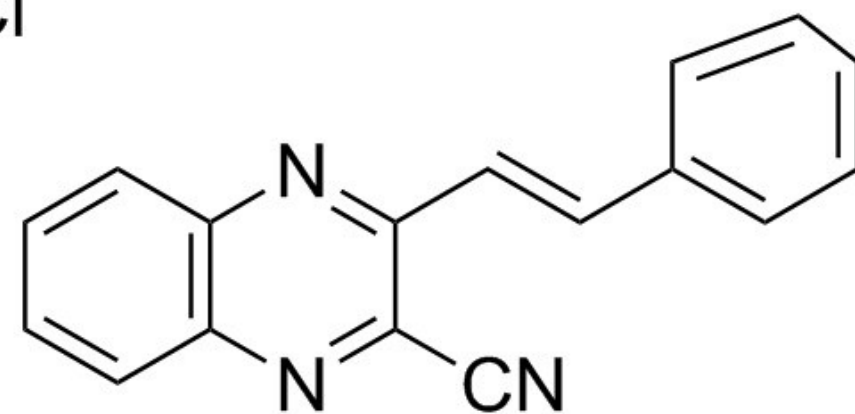

**6f** (91%, 15 min)

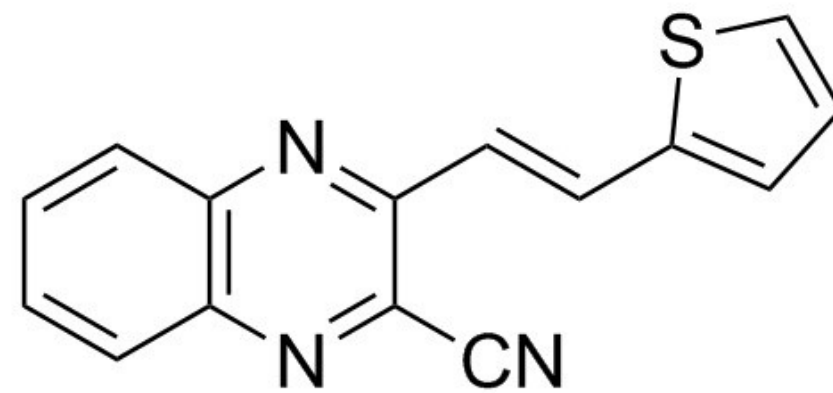

**6h** (95%, 20 min)

Supplement: c5ob01690h6.pdf [file c5ob01690h6.pdf]

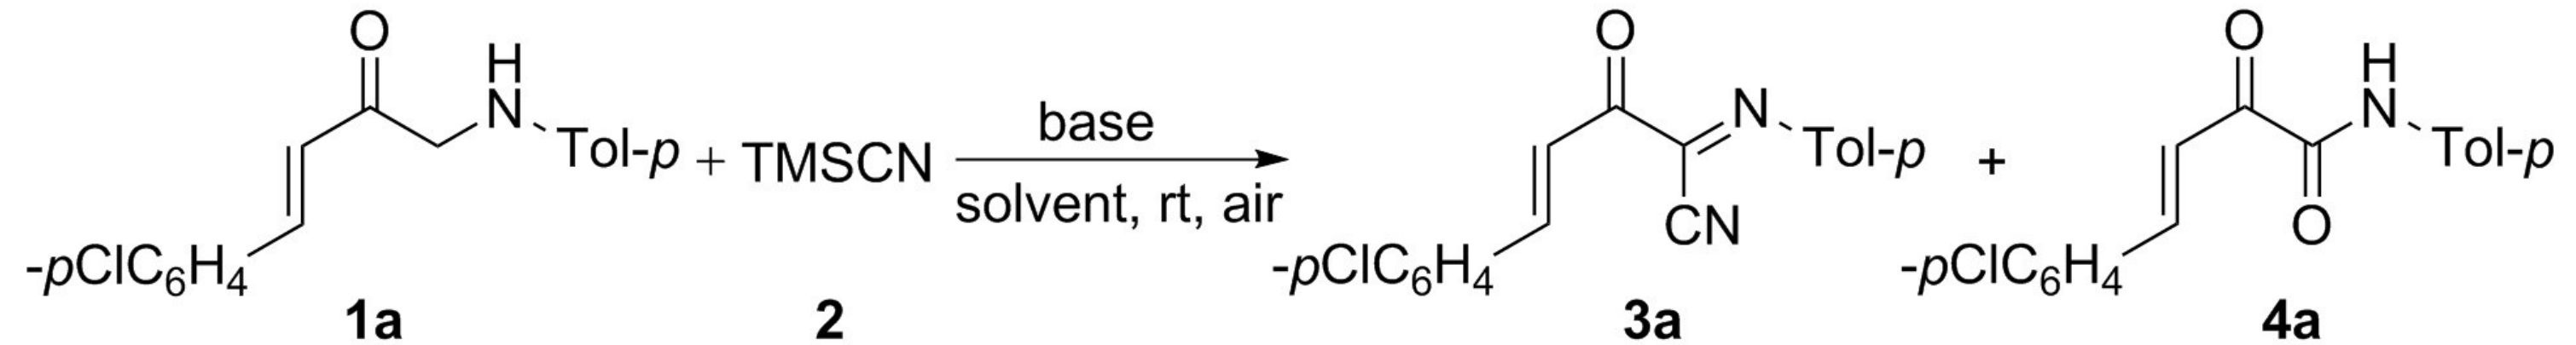

Supplement: c5ob01690h9.pdf [file c5ob01690h9.pdf]
